# Supplementary material for: Nanoelicitors with prolonged retention and sustained release to produce beneficial compounds in wines
Source: Royal Society of Chemistry journal article supplement (doi:10.1039/d1en00504a), 2021-01-01
Supplement: d1en00504a1.pdf [file d1en00504a1.pdf]

## Supporting information for

# Nanoelicitors with prolonged retention and sustained release to produce beneficial compounds in wine

Belén Parra-Torrejón<sup>a</sup>, Gloria B. Ramírez-Rodríguez,<sup>a,\*</sup> Maria J. Gimenez-Bañon,<sup>b</sup>  
Juan D. Moreno-Olivares,<sup>b</sup> Diego F. Paladines-Quezada,<sup>b</sup> Rocío Gil-Muñoz,<sup>b</sup>  
José M. Delgado-López<sup>a,\*</sup>

<sup>a</sup> Departamento de Química Inorgánica, Facultad de Ciencias, Universidad de Granada,  
Av. Fuente Nueva, s/n, 18071 Granada, Spain.

<sup>b</sup> Instituto Murciano de Investigación y Desarrollo Agroalimentario, Ctra. La Alberca  
s/n, 30150, Murcia, Spain.

(\*) Authors to whom any correspondence should be addressed: J.M.D.-L.

([jmdl@ugr.es](mailto:jmdl@ugr.es)); G.B.R.-R. ([gloria@ugr.es](mailto:gloria@ugr.es))

## Table of contents

### S1. MeJ quantification by UV-Vis spectroscopy

Fig. S1.

Fig. S2.

Fig. S3.

Fig. S4.

Fig. S5.

Fig. S6.

Fig. S7.

Fig. S8.

Table S1.

Table S2.

## S1. MeJ quantification by UV-Vis spectroscopy

MeJ ketone group strongly absorbs in the UV region near  $\lambda = 291$  nm and its ester group absorbs at  $\lambda = 214$  nm (Figure S1a).<sup>1</sup> We selected the former absorption band for the calibration curves. Taking into account the low solubility of MeJ, we carried out two calibration curves: (1) 100-800 ppm in ultrapure water (Figure S1b, green dots) and (2) 100-2000 ppm ultrapure water:ethanol (50:50, Figure S1b, blue dots). The fitting parameters for each curves are:

$$Abs = 1.73 \cdot 10^{-4} [MeJ] + 0.0078 \quad R^2 = 0.99 \quad (1)$$

$$Abs = 2.07 \cdot 10^{-4} [MeJ] - 0.0028 \quad R^2 = 0.99 \quad (2)$$

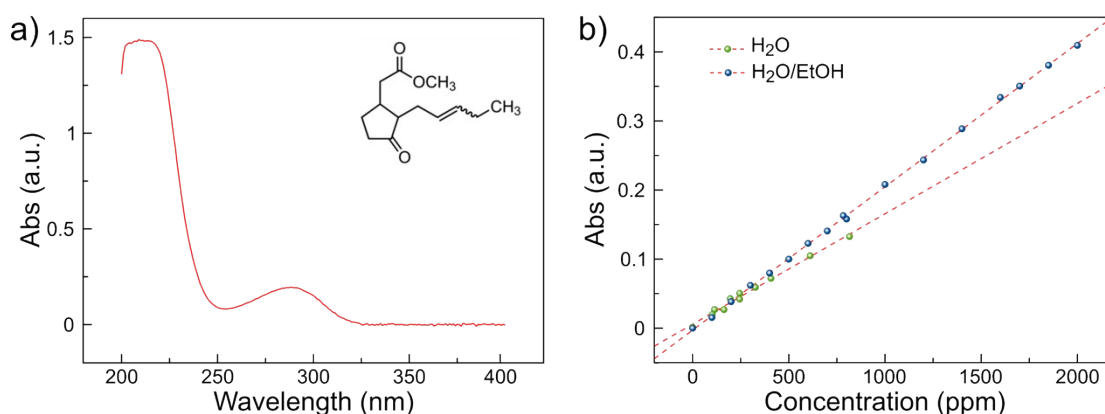

**Fig. S1** UV-Vis spectrum (a) and calibration curve (b) of methyl jasmonate in H<sub>2</sub>O (green dots) and H<sub>2</sub>O/EtOH (1:1, blue dots). Dashed lines represent the best fits of the experimental data according to equation 1 for H<sub>2</sub>O and equation 2 for H<sub>2</sub>O/EtOH.

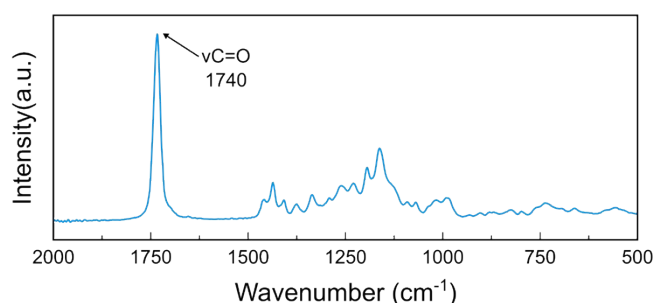

**Fig. S2** FTIR spectrum of MeJ showing the most intense absorption band at 1740 cm<sup>-1</sup> corresponding to carbonyl (ketone) groups.<sup>2</sup>

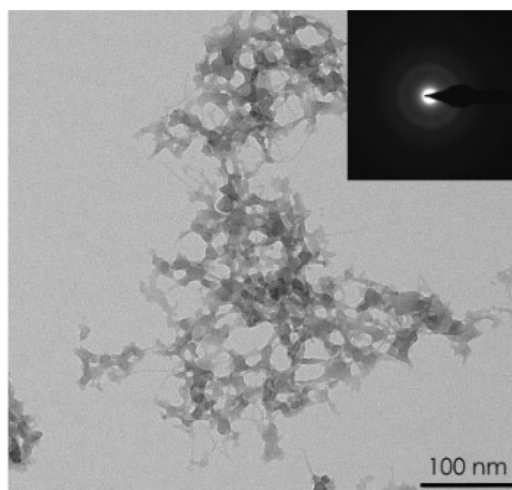

**Fig. S3** TEM micrograph of nano-MeJ. The nanoparticles shows the same morphology than control ACP nanoparticles.<sup>3</sup> The amorphous nature of the particles is confirmed by the lack of diffraction spots in the selected-area electron diffraction (SAED) pattern (inset).

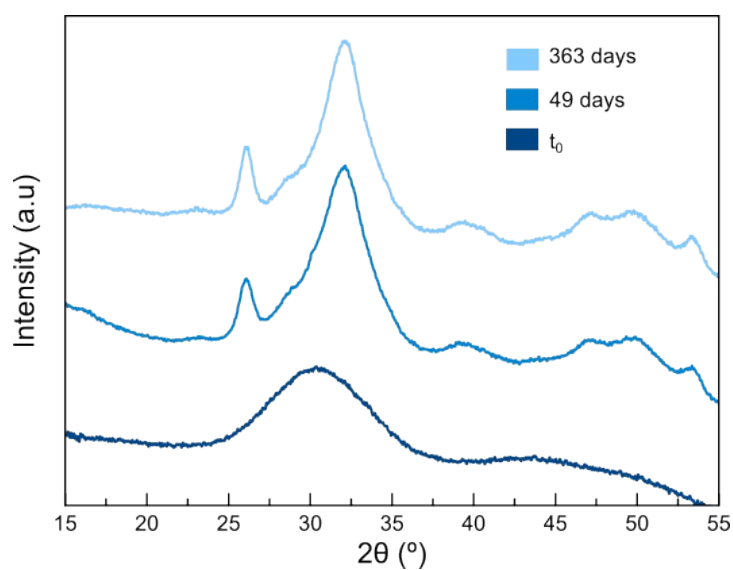

**Fig. S4** XRD patterns of nano-MeJ sample freeze-dried at time 0, 49 and after 363 days. XRD patterns after 49 and 363 days of storage show two broad Bragg peaks at around  $26^{\circ}$  and  $32^{\circ}$  ( $2\theta$ ) ascribed to hydroxyapatite (HA, ASTM card file No 09-432).

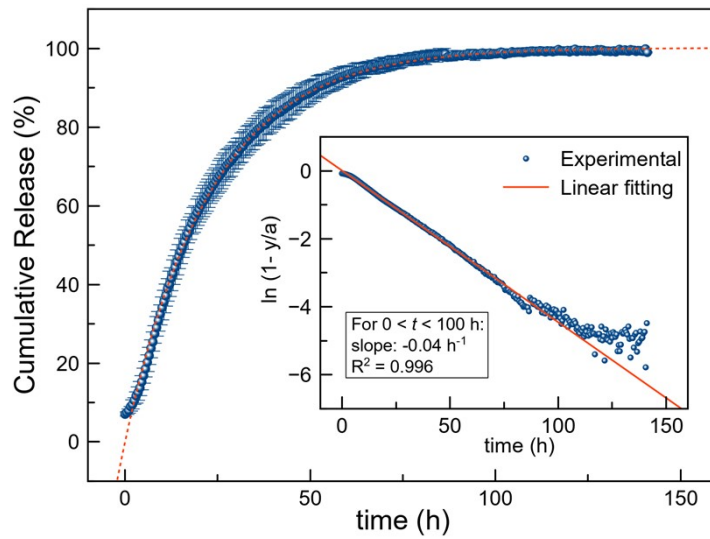

**Fig. S5** MeJ release profile from nano-MeJ in ultrapure water. Dashed line represents the best fits of the experimental data to the first order equation:  $y(t) = a*(1-e^{-kt})$ , being the rate constant,  $k = 0.05 \text{ h}^{-1}$ . The inset shows the linearized experimental data (symbols) and the first order equation (line).

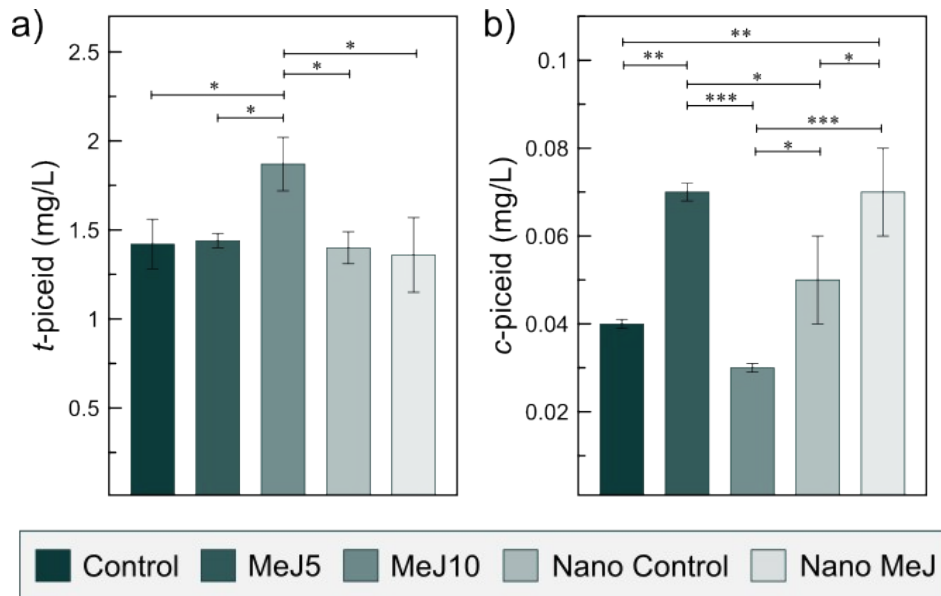

**Fig. S6** (a) *t*-piceid and (b) *c*-piceid concentration ( $\text{mg L}^{-1}$ ) in wines from grapes treated with MeJ (5 mM, MeJ5, and 10 mM, MeJ10) and nano-MeJ with a total concentration of 1 mM. Results of grapes treated with ACP nanoparticles (nano-Control) and non-treated grapes (control) are also shown. Data are expressed as mean with their corresponding standard deviation as error bars. Statistically significant differences between measurements are marked with \* (P-value < 0.05), \*\* (P-value < 0.01) or \*\*\* (P-value < 0.001).

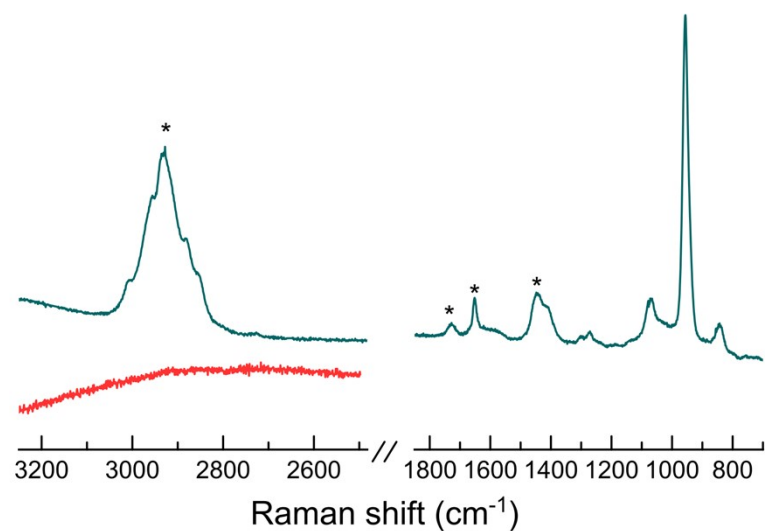

**Fig. S7** Raman spectroscopy of 10 mM MeJ (red spectrum) and NanoMeJ (blue spectrum) after 24 hours at 50°C. Asterisks indicate the presence of MeJ.

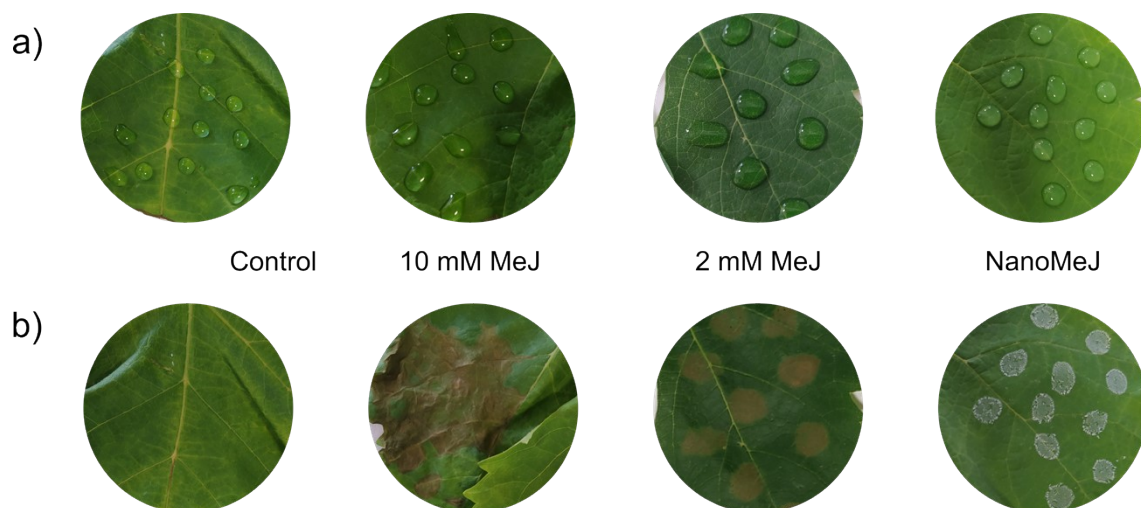

**Fig. S8.** Images of vineyards leaves treated with water (Control), MeJ solution (10 and 2 mM) and NanoMeJ (2 mM) at time zero (a) and after 24 hours (b).

**Table S1.** Chemical composition and  $\zeta$ -potential of nano-MeJ and ACP nanoparticles (nano-Control). Data are expressed as mean  $\pm$  standard deviation.

|              | Ca <sup>a</sup><br>(wt.%) | P <sup>a</sup><br>(wt.%) | K <sup>a</sup><br>(wt.%) | Ca/P <sup>a</sup> | $\zeta$ <sup>b</sup><br>(mV) | MeJ <sup>c</sup><br>(wt.%) |
|--------------|---------------------------|--------------------------|--------------------------|-------------------|------------------------------|----------------------------|
| Nano-MeJ     | 18.02 $\pm$ 4.3           | 8.79 $\pm$ 1.3           | 0.27 $\pm$ 0.01          | 1.57 $\pm$ 0.13   | -15.7 $\pm$ 0.6              | 6.15 $\pm$ 1.71            |
| Nano-Control | 14.7 $\pm$ 0.14           | 8.06 $\pm$ 0.1           | 0.46 $\pm$ 0.01          | 1.41 $\pm$ 0.03   | -10.3 $\pm$ 0.7              | -                          |

<sup>a</sup>Analysed by ICP-OES. <sup>b</sup>Analysed by Litesizer 500. <sup>c</sup>Estimated by UV-Vis spectroscopy

**Table S2.** Enological parameters of the must from grapes under each treatment. Statistically significant differences between measurements are marked with \*\* (P-value < 0.01) whereas ns means no statistical differences.

|                        | Control        | Nano-Control   | MeJ            | Nano-MeJ       | P  |
|------------------------|----------------|----------------|----------------|----------------|----|
| °Baumé                 | 12.9 $\pm$ 0.4 | 13.1 $\pm$ 0.2 | 12.8 $\pm$ 0.2 | 12.9 $\pm$ 0.4 | ns |
| Total Acidity<br>(g/L) | 2.8 $\pm$ 0.2b | 2.5 $\pm$ 0.1c | 3.2 $\pm$ 0.2a | 2.9 $\pm$ 0.1b | ** |
| pH                     | 3.9 $\pm$ 0.1  | 3.9 $\pm$ 0.1  | 3.8 $\pm$ 0.1  | 3.9 $\pm$ 0.1  | ns |

## References

- 1 J. Islam, S. Phukan and P. Chattopadhyay, Development of a validated RP-HPLC/DAD method for the quantitative determination of methyl jasmonate in an insect repellent semi-solid formulation, *Heliyon*, 2019, **5**, e01775.
- 2 T. Sato, T. Kawara, K. Sakata and T. Fujisawa, Jasmonoid Synthesis from sci-4-Heptenoic Acid, *Bull. Chem. Soc. Jpn.*, 1981, **54**, 505–508.
- 3 G. B. Ramírez-Rodríguez, G. Dal Sasso, F. J. Carmona, C. Miguel-Rojas, A. Pérez-de-Luque, N. Masciocchi, A. Guagliardi and J. M. Delgado-López, Engineering Biomimetic Calcium Phosphate Nanoparticles: A Green Synthesis of Slow-Release Multinutrient (NPK) Nanofertilizers, *ACS Appl. Bio Mater.*, 2020, **3**, 1344–1353.
